# Supplementary material for: Thermoresponsive shear-thinning hydrogel (T-STH) hemostats for minimally invasive treatment of external hemorrhages
Source: Royal Society of Chemistry journal article supplement (doi:10.1039/d2bm01559e), 2022-12-08
Supplement: d2bm01559e2.pdf [file d2bm01559e2.pdf]

Mecwan et al.

## SUPPORTING INFORMATION

### Thermoresponsive shear-thinning hydrogel (T-STH) hemostats for minimally invasive treatment of external hemorrhages

Marvin Mecwan, \* Reihaneh Haghniaz, Alireza Hassani, Kalpana Mandal, Vadim Jucaud, Johnson V. John, \* and Ali Khademhosseini \*

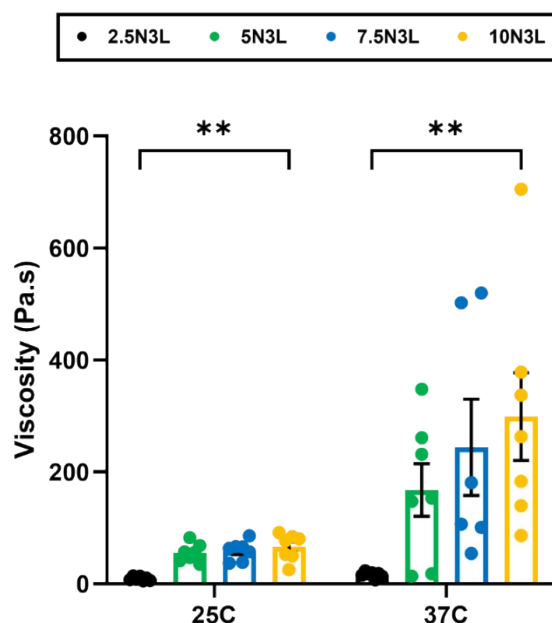

**Supplementary Figure 1.** The viscosity of our p(NIPAM) and Laponite-based T-STH determined by shear rate sweeps at room temperature (25 °C) and body temperature (37 °C) \*\* signifies  $p < 0.01$ .

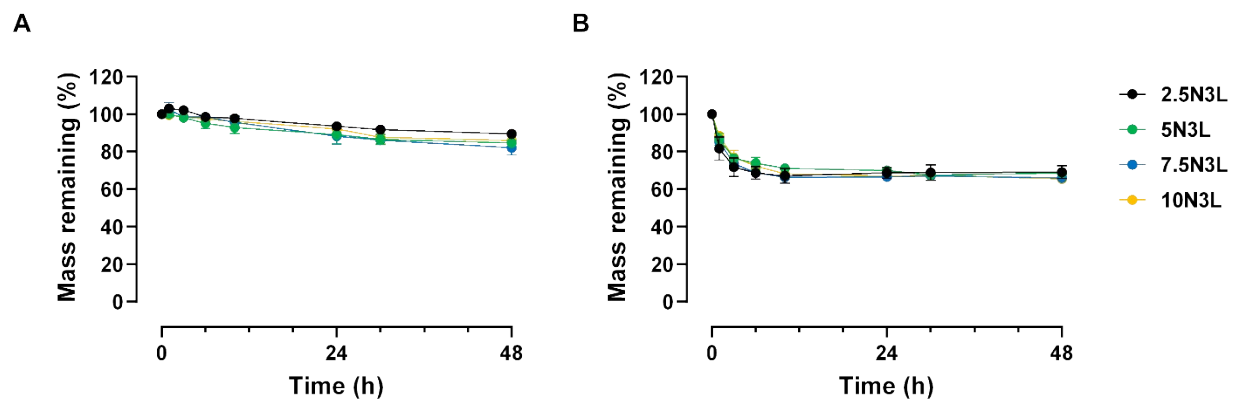

**Supplementary Figure 2.** 48 h degradation of our p(NIPAM) and Laponite-based T-STH at 37 °C in (A) PBS, and (B) human plasma.

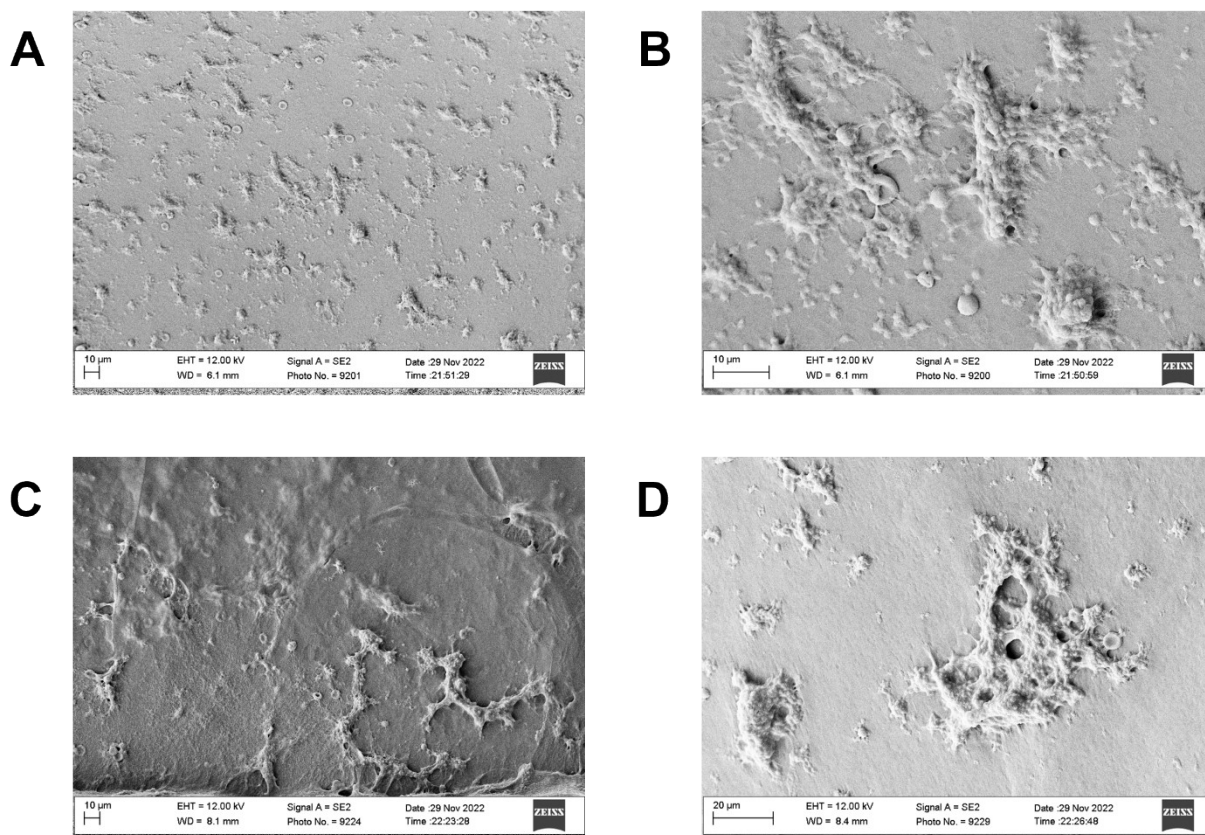

**Supplementary Figure 3.** SEM images of platelet adhesion to our p(NIPAM) and Laponite-based T-STH. Lower magnification images of (A) 5N3L and (C) 10N3L. Higher magnification images of (B) 5N3L and (D) 10N3L

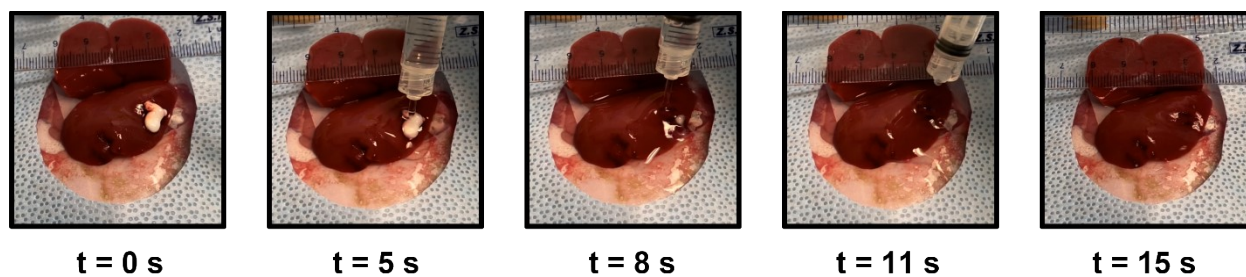

**Supplementary Figure 4.** Time-lapse digital images of our p(NIPAM) and Laponite-based T-STH (10N3L) being washed away from the injured liver using cold saline without rebleeding and without leaving any residue.
